# Supplementary material
Source: PubMed Central journal article supplement (PMC7576953)
Supplement: Appendix_Table_1.pdf [file Appendix_Table_1.pdf]

**Appendix: Table 1**

|                             | Glycemic Variability | rtCGM Group (8 weeks) continue rtCGM (16 weeks) |         |
|-----------------------------|----------------------|-------------------------------------------------|---------|
|                             |                      | Median change [n=15]                            | p-value |
| Variability of glycaemia    | SD                   | -0.02 (-0.1 to 0.1)                             | 0.955   |
|                             | LI                   | 0.30 (-0.3 to 0.7)                              | 0.281   |
|                             | MAG                  | 0.02 (-0.1 to 0.1)                              | 0.460   |
|                             | MODD                 | -0.00 (-0.2 to 0.2)                             | 0.865   |
|                             | MAGE                 | 0.04 (-0.2 to 0.2)                              | 0.460   |
|                             | CV                   | 0.01 (0.0 to 0.0)                               | 0.910   |
|                             | CONGA1               | 0.07 (0.0 to 0.2)                               | 0.191   |
|                             | CONGA2               | 0.05 (0.0 to 0.3)                               | 0.156   |
|                             | GVP                  | 0.77 (-1.6 to 2.8)                              | 0.460   |
| Quality of glycemic control | M-VALUE              | 0.13 (-0.8 to 1.4)                              | 0.865   |
|                             | GRADE                | -0.43 (-0.9 to 0.8)                             | 0.865   |
|                             | GRADE - %Hypo        | 0.31 (-1.2 to 3.6)                              | 0.570   |
|                             | GRADE - %Eugly       | 0.04 (-1.2 to 1.8)                              | 1.000   |
|                             | GRADE - %Hyper       | -0.64 (-5.1 to 3.7)                             | 0.820   |
|                             | JINDEX               | -1.50 (-3.0 to 4.7)                             | 0.865   |
|                             | PGS                  | 0.61 (-0.8 to 1.9)                              | 0.307   |
|                             | IGC                  | 0.03 (-0.5 to 0.5)                              | 1.000   |
| Glycemic risk               | ADRR                 | 0.27 (-3.1 to 3.2)                              | 0.910   |
|                             | LBGI                 | 0.11 (-0.3 to 0.3)                              | 0.955   |
|                             | HBGI                 | -0.39 (-0.9 to 1.4)                             | 0.820   |
|                             | RI                   | 0.12 (-0.7 to 0.5)                              | 0.820   |
